# Supplementary material for: Ultrasensitive visual read-out of nucleic acids using electrocatalytic fluid displacement
Source: PubMed Central journal article supplement (PMC4421844; doi:10.1038/ncomms7978), 2015-04-22
Supplement: ncomms7978-s1.pdf [file ncomms7978-s1.pdf]

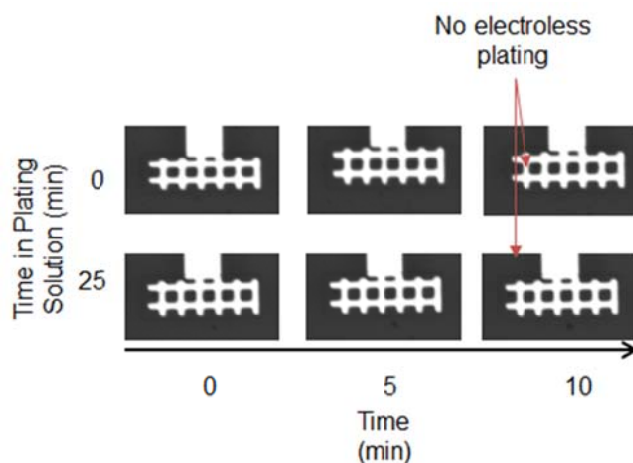

**Supplementary Figure 1 | Effect of electroless deposition.** Electrodes were immersed in 30%  $\text{H}_2\text{O}_2$  before and after dipping in a platinum solution for 25 minutes (no potential was applied). Bubbles do not form after 10 minutes in either case, indicating there is no appreciable electroless deposition.

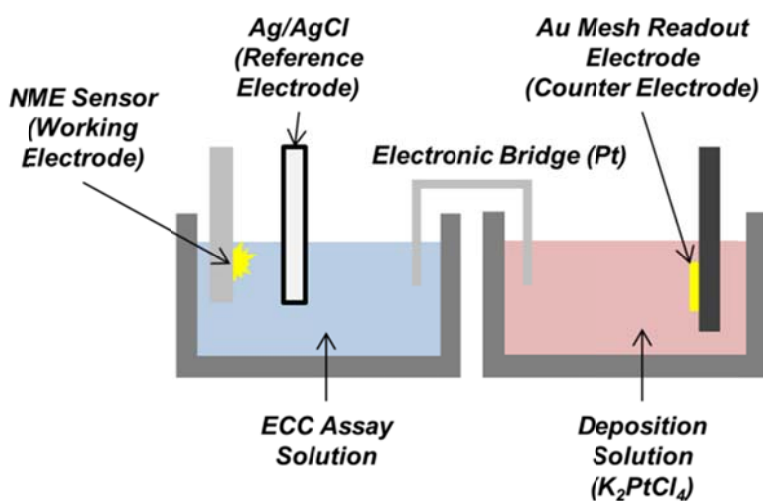

**Supplementary Figure 2 | Setup used for electrochemical sensing.** The NME acts as the working electrode and the Au mesh readout electrode acts as the counter electrode. A platinum wire serves as an electronic bridge between the two solutions.

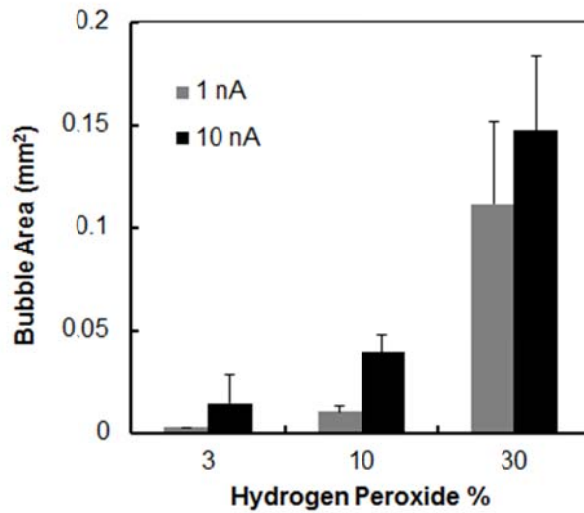

**Supplementary Figure 3 | Effect of hydrogen peroxide concentration on bubble growth.** We measured the effect of hydrogen peroxide concentration on bubble growth after 2 minutes in peroxide solution for various applied currents. By tuning the peroxide concentration it is possible to control the rate of bubble growth. When 3% peroxide is used, no bubbles form after applying a 1 nA deposition current.

| Description                                  | Value                                                   |
|----------------------------------------------|---------------------------------------------------------|
| Channel Height                               | 50 $\mu\text{m}$                                        |
| Channel Width                                | 200 $\mu\text{m}$                                       |
| Solubility of Oxygen in Water                | 7.6 mg/L                                                |
| Catalysis rate of platinum                   | $8.84 \times 10^{-4} \text{ mol s}^{-1} \text{ m}^{-2}$ |
| Hydrogen Peroxide Concentration              | 15%                                                     |
| Molar absorptivity of the electrochromic dye | $1 \times 10^7 \text{ M}^{-1} \text{ m}^{-1}$           |
| Optical Density (OD) of the Dye in Channel   | 1                                                       |

**Supplementary Table 1 | Parameters used to calculate time to visual appearance.** Parameters used in calculating the time required to induce a visible change using various methods.
